# Supplementary material for: Innerklinische Notfallversorgung in der Bundesrepublik Deutschland. Eine Standortbefragung der Kliniken des Deutschen Reanimationsregisters
Source: Springer Nature journal article supplement (doi:10.1007/s00101-021-01075-7), 2021-12-10
Supplement: MOESM1 [file 19948610]

Zusatzmaterial zum Beitrag „**Innerklinische Notfallversorgung in der Bundesrepublik Deutschland. Eine Standortbefragung der Kliniken des Deutschen Reanimationsregisters**“ von Jansen G., Kappelhoff N., Borgstedt R. et al. (2021) in *Der Anaesthesist*.

Beitrag und Zusatzmaterial stehen Ihnen auf [www.springermedizin.de](http://www.springermedizin.de) zur Verfügung. Bitte geben Sie dort den Beitragstitel in die Suche ein.

## Fragenkatalog

1. Wenn Antwort Deutschland: In welchem Bundesland liegt Ihre Klinik? [Einfachauswahl]
  - Baden-Württemberg
  - Bayern
  - Berlin
  - Brandenburg
  - Bremen
  - Hamburg
  - Hessen
  - Mecklenburg-Vorpommern
  - Niedersachsen
  - Nordrhein-Westfalen
  - Rheinland-Pfalz
  - Saarland
  - Sachsen
  - Sachsen-Anhalt
  - Schleswig-Holstein
  - Thüringen
  
2. Welche Versorgungsstufe hat Ihr Krankenhaus? [Einfachauswahl]
  - < 200 Betten
  - 200 – 400 Betten
  - 400 – 600 Betten
  - 600 – 800 Betten
  - > 800 Betten
  
3. Wie ist das Krankenhaus an dem sich Ihre Station befindet organisiert? [Einfachauswahl]
  - Alle Kliniken und Institute sind in einem Gebäude vorhanden
  - Die Kliniken und Institute sind im Pavillon-System auf einem Gelände organisiert
  - Die Klinik umfasst mehrere räumlich getrennte Standorte in einer Stadt.
  
4. Welcher Fachabteilung gehört Ihre Station an? (Einfachauswahl)
  - Innere (inkl. aller Subspezialisierungen)
  - Chirurgie (inkl. aller Subspezialisierungen)
  - Anästhesiologie
  - Pädiatrie
  - Weitere: [Freitext]
  
5. Sind alle Patienten Ihrer Abteilung im Notfall durch das innerklinische Notfallteam Ihres Krankenhauses zu erreichen? [Einfachauswahl]
  - Ja
  - Nein

6. Stellt Ihre Station selbst eines oder mehrere innerklinische Notfallteams an Ihrem Klinikstandort (Reanimationsalarm und / oder „medical emergency teams (MET)“)?
- Ja, eines
  - Ja, mehrere
  - Nein
7. Wenn mehrere: Wie viele Notfallteams stellt Ihre Station? [Einfachauswahl]
- Zwei
  - Drei
  - Vier
  - Fünf
  - Sechs
  - Sieben
  - Acht
  - Neun
  - Zehn
  - Mehr als zehn
8. Welchen Namen trägt ihr Notfallteam? [Einfachauswahl]
- Rea-Team / Reanimationsteam
  - RRT / Rapid-Response-Team
  - Notfallteam
  - MET / Medical Emergency Team
  - Interventionsteam
  - Herzalarm
  - Critical Care Outreach Team
  - [Freitext]
9. Wie häufig wird Ihr Notfallteam pro Monat alarmiert? [Einfachauswahl]
- Weniger als 5-mal
  - 6 – 10-mal
  - 11 – 15-mal
  - 16 – 20-mal
  - Mehr als 20-mal
10. Gibt es eine standardisierte Zusammensetzung Ihres Notfallteams? [Einfachauswahl]
- Ja
  - Nein
- 10a Wenn ja: Wie ist ihr Notfallteam planmäßig zusammengesetzt?
- \_\_\_ Oberärzte
  - \_\_\_ Fachärzte
  - \_\_\_ Assistenzärzte
  - \_\_\_ Fachkrankenpflege
  - \_\_\_ Krankenpflege
  - \_\_\_ Notfallsanitäter / Rettungsassistent / Vergleichbar
11. Wie ist Ihr Notfallteam in der Praxis zusammengesetzt?
- \_\_\_ Oberärzte
  - \_\_\_ Fachärzte
  - \_\_\_ Assistenzärzte
  - \_\_\_ Fachkrankenpflege
  - \_\_\_ Krankenpflege

- o \_\_\_ Notfallsanitäter / Rettungsassistent / Vergleichbar
12. Sind die Mitglieder des Notfallteams ausschließlich für die Versorgung akuter innerklinischer Notfälle eingeteilt?
- o Ja
  - o Nein, es werden weitere Aufgaben wahrgenommen
13. Wenn nein: Welche Aufgaben erfüllen die Mitglieder des Notfallteams darüber hinaus?
- o Reguläre Patientenversorgung auf Intensivstation
  - o Reguläre Patientenversorgung im OP
  - o Reguläre Patientenversorgung in der Notaufnahme
  - o Reguläre Patientenversorgung im Rahmen des Notarztdienstes
  - o Reguläre Patientenversorgung in einer Funktionsabteilung
  - o Reguläre Patientenversorgung Normalstation
14. Ist eine abgeschlossene von Ihrer Abteilung konzipierte Fortbildung zwingende Voraussetzung für die Teilnahme am Notfallteam [Einfachauswahl]
- o Ja, für Ärzte
  - o Ja, für nicht-ärztliches Personal
  - o Ja, für beide
  - o Nein
15. Wenn ja: Wie viele Stunden umfasst Ihre innerklinische Fortbildung? [Einfachauswahl]
- o < 16 Stunden (< 2 Tage)
  - o 16 – 24 Stunden (2 – 3 Tage)
  - o 24 – 32 Stunden (3 – 4 Tage)
  - o 32 – 40 Stunden (4 – 5 Tage)
  - o > 40 Stunden (> 5 Tage)
16. Wenn ja: Welche Inhalte werden vermittelt? [Mehrfachauswahl]
- o Reanimationstraining Basic Life Support
  - o Reanimationstraining Advanced Life Support
  - o Reanimationstraining für kindliche Notfälle (PALS)
  - o Simulatorgestützte Fallbeispiele
  - o Airwaymanagement (Theorie & Praxis an Simulatoren)
  - o Airwaymanagement (Praktikum im OP)
  - o Team-Ressource-Management
  - o Notfallsonographie
  - o Thoraxdrainage
  - o i.o-Zugang
  - o Traumaversorgung (ABCDE-Schema)
17. Mit was für Equipment ist Ihr Notfallteam im Regelfall ausgerüstet?
- o Notfallrucksack
  - o Monitor / 4-Pol-EKG
  - o Monitor / 12-Kanal-EKG
  - o Nicht invasive Blutdruckmessung
  - o Invasive Blutdruckmessung
  - o Mobiles Beatmungsgerät ohne Möglichkeit zur Nicht-invasiven Beatmung (NIV)
  - o Mobiles Beatmungsgerät mit Möglichkeit zur Nicht-invasiven Beatmung (NIV)
  - o Echokardiographie
  - o Mechanische Kompressionshilfen
  - o Videolaryngoskopie

- Blutkulturflaschen & Breitband-AB
  - Point of Care Diagnostik
18. Transportiert das Notfallteam / Transportieren Ihre Notfallteams Patienten unter Reanimations-Bedingungen?
- Ja
  - Nein
19. Wenn ja: Wie führen Sie diese Reanimationen während der Fahrt durch?
- Manuell
  - Externes Reanimationsgerät
  - ECMO
20. Wenn externes Reanimationsgerät: Welches mechanisches Reanimationsgerät wird für die Reanimationen genutzt?
- [Freitext]
21. Wenn manuell: Welche Position nehmen Ihre Helfer dabei ein?
- Bild 1 – Laufend neben dem Bett
  - Bild 2 – Knieend neben dem Patienten
  - Bild 3 – Auf Hüfte des Patienten sitzend
22. Wie erfolgt die Dokumentation der Einsätze?
- Konsil
  - Standard Anästhesieprotokoll der Klinik
  - Standard Notfallprotokoll angelehnt an Vorgaben einer Fachgesellschaft (z.B. DIVI ...)
  - Selbstentworfenes Notfallprotokoll der Klinik
  - Keine Dokumentation

**Folgende Fragen dienen der Erfassung welche Alarmierungswege in ihrem Klinikum durchgeführt werden.**

23. Existieren an ihrem Krankenhaus Frühwarnsysteme?
- Nein (→ Weiter mit Frage 25)
  - Ja
24. Wenn ja: Welche Frühwarnsysteme existieren an Ihrem Krankenhaus?
- Standardisierte Protokolle anhand definierter Abweichungen von Vitalfunktionen
  - Standardisierte Protokolle anhand definierter Abweichungen von Laborparametern
  - Telemetrie
  - Patientenschulung in der Früherkennung von vitalen Störungen
  - Angehörigenschulung in der Früherkennung von vitalen Störungen
  - Sonstige
25. Lautet die Notrufnummer in Ihrem Klinikum 2222 (gemäß den Empfehlungen des ERC)?
- Ja (→ Weiter mit Frage 27)
  - Nein
26. Wenn Nein: Wie viele Notrufnummern existieren an Ihrem Klinikum?
- Eine
  - Zwei
  - Drei
  - Vier

- Mehr als vier
27. An welcher Stelle wird der veranlasste Notruf angenommen?
- Rezeption der Klinik
  - Ärztliches Personal des Notfallteams
  - Nicht-ärztliches Personal des Notfallteams
  - Sonstige: [Freitext]
28. Welchen Meldeweg nutzen Sie für Ihre Notrufe?
- Pieper
  - Stationäres Telefon
  - Mobiles Telefon
  - Andere: (Freitext)
29. Nutzen Sie eine Protokoll-basierte Notrufabfrage?
- Ja
  - Nein
30. Gibt es eine standardisierte Anleitung zur innerklinischen Telefonreanimation?
- Ja
  - Nein
31. In welcher Zeit nach Notruf werden innerhalb ihres Krankenhauses die Notfallpatienten erreicht?
- < 5 Minuten
  - 5 – 10 Minuten
  - 10 – 15 Minuten
  - > 15 Minuten
  - Es erfolgt keine Zeiterfassung
